# Supplementary material for: Serious adverse events reported in placebo randomised controlled trials of oral naltrexone: a systematic review and meta-analysis
Source: Springer Nature journal article supplement (doi:10.1186/s12916-018-1242-0), 2019-01-08

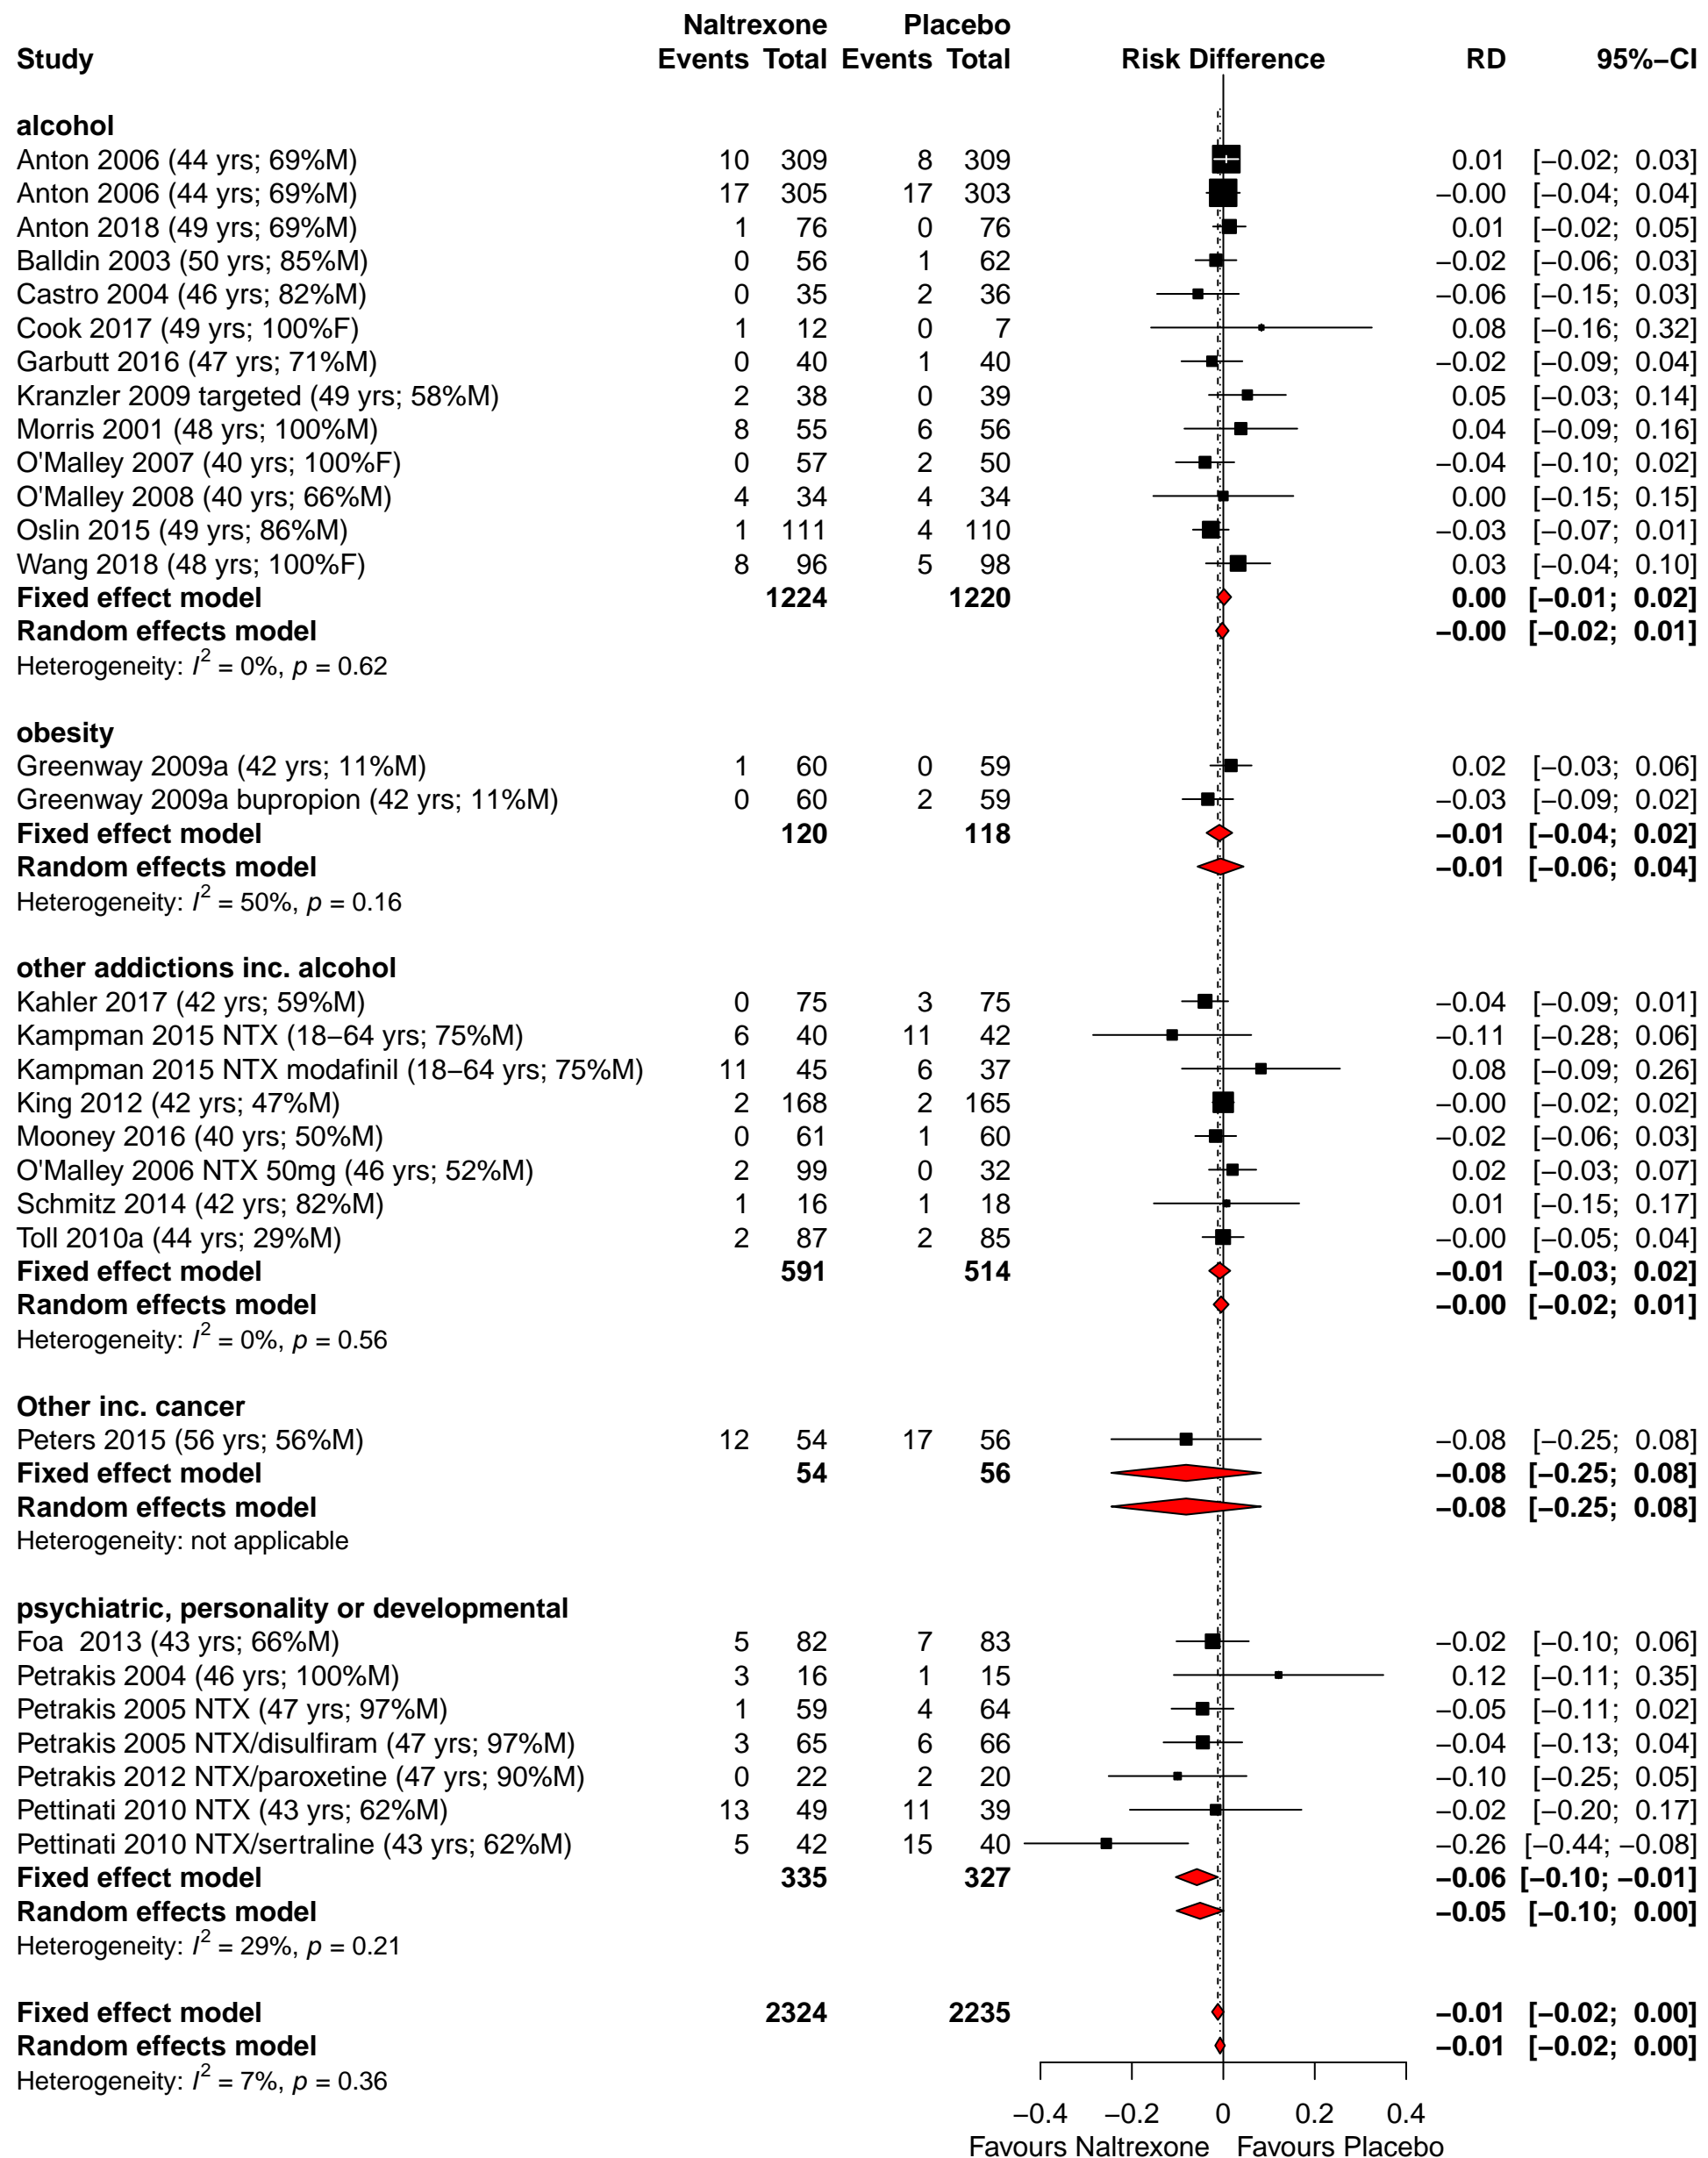

Supplement: MOESM6 [file 16399406]
